# Supplementary material for: Oncologic Outcomes of Laparoscopic Radical Hysterectomy Using the No-Look No-Touch Technique for Early Stage Cervical Cancer: A Propensity Score-Adjusted Analysis
Source: MDPI journal article supplement (doi:10.3390/cancers13236097), 2021-12-03
Supplement: s1 [file s1]

# Oncologic Outcomes of Laparoscopic Radical Hysterectomy Using the No-Look No-Touch Technique for Early Stage Cervical Cancer: A Propensity Score-Adjusted Analysis

Atsushi Fusegi, Hiroyuki Kanao, Naoki Ishizuka, Hidetaka Nomura, Yuji Tanaka, Makiko Omi, Yoichi Aoki, Tomoko Kurita, Mayu Yunokawa, Kohei Omatsu, Koji Matsuo and Naoyuki Miyasaka

**Table S1. Clinicopathological characteristics of patients with tumor size  $\geq 2$  cm**

|                          | ARH ( $n = 81$ ) | NLNT ( $n = 56$ ) | <i>P</i> -value |
|--------------------------|------------------|-------------------|-----------------|
| Age (years)              | 47.0 (41.0–60.0) | 42.0 (36.8–47.3)  | 0.004           |
| BMI (kg/m <sup>2</sup> ) | 21.5 (20.2–23.9) | 20.7 (19.3–23.6)  | 0.073           |
| Tumor size (cm)          | 2.8 (2.4–3.5)    | 2.9 (2.3–3.5)     | 0.859           |
| Vaginal tumor extension  |                  |                   | 0.010           |
| Negative                 | 69 (85.2%)       | 53 (94.6%)        |                 |
| Positive                 | 12 (14.8%)       | 3 (5.4%)          |                 |
| Histological subtype     |                  |                   | 0.410           |
| SCC                      | 38 (46.9%)       | 30 (53.6%)        |                 |
| AC                       | 22 (27.2%)       | 17 (30.4%)        |                 |
| ASC                      | 21 (25.9%)       | 9 (16.0%)         |                 |
| Post-conization          |                  |                   | 0.999           |
| No                       | 79 (97.5%)       | 54 (93.1%)        |                 |
| Yes                      | 2 (2.5%)         | 4 (6.9%)          |                 |
| pT                       |                  |                   | 0.231           |
| 1b1                      | 51 (63.0%)       | 39 (69.6%)        |                 |
| 1b2                      | 9 (11.1%)        | 3 (5.4%)          |                 |
| 2a1                      | 10 (12.3%)       | 3 (5.4%)          |                 |
| 2a2                      | 2 (2.5%)         | 5 (8.9%)          |                 |

|                      |            |            |       |
|----------------------|------------|------------|-------|
| 2b                   | 9 (11.1%)  | 6 (10.7%)  |       |
| pN                   |            |            | 0.845 |
| N0                   | 59 (72.8%) | 42 (75.0%) |       |
| N1                   | 22 (27.2%) | 14 (25.0%) |       |
| Stromal invasion     |            |            | 0.013 |
| <1/2                 | 25 (30.9%) | 30 (53.6%) |       |
| ≥1/2                 | 56 (69.1%) | 26 (46.4%) |       |
| Parametrium invasion |            |            | 0.999 |
| Negative             | 72 (88.9%) | 50 (89.3%) |       |
| Positive             | 9 (11.1%)  | 6 (10.7%)  |       |
| Venous invasion      |            |            | 0.587 |
| Negative             | 54 (66.7%) | 34 (60.7%) |       |
| Positive             | 27 (33.3%) | 22 (39.3%) |       |
| Lymphatic invasion   |            |            | 0.730 |
| Negative             | 39 (48.1%) | 29 (51.8%) |       |
| Positive             | 42 (51.9%) | 27 (48.2%) |       |
| Cut margin           |            |            | 0.645 |
| Negative             | 78 (96.3%) | 55 (98.2%) |       |
| Positive             | 3 (3.7%)   | 1 (1.8%)   |       |
| Adjuvant therapy     |            |            | 0.082 |
| None                 | 26 (32.1%) | 22 (39.3%) |       |
| Radiation            | 1 (1.2%)   | 0          |       |
| Chemotherapy         | 44 (54.4%) | 33 (58.9%) |       |
| CCRT                 | 10 (12.3%) | 1 (1.8%)   |       |

Data are presented as medians (interquartile ranges) or n (%). Abbreviations: ARH, abdominal radical hysterectomy; NLNT, total laparoscopic radical hysterectomy using no-look no-touch technique; BMI, body mass index; SCC, squamous cell carcinoma; AC, adenocarcinoma; ASC, adenosquamous carcinoma; CCRT, concurrent chemoradiation therapy.
